# Supplementary material for: Load-bearing study and interfacial interactions of hydroxyapatite composite coatings for bone tissue engineering
Source: Royal Society of Chemistry journal article supplement (doi:10.1039/d2qm00898j), 2022-01-01
Supplement: d2qm00898j1.pdf [file d2qm00898j1.pdf]

## **Supporting Information**

### **Load Bearing Study and Interfacial Interactions of Hydroxyapatite Composite Coatings for Bone Tissue Engineering**

Shikha Awasthi<sup>1\*</sup>, Sarvesh Kumar Pandey<sup>2\*</sup>, Jeet Kumar Gaur<sup>3</sup> and Chandan Srivastava<sup>1\*</sup>

<sup>1</sup>Department of Materials Engineering, Indian Institute of Science, Bangalore, 560012, India

<sup>2</sup>Department of Inorganic and Physical Chemistry, Indian Institute of Science Bangalore, Bangalore  
- 560012, India

<sup>3</sup>Department of Mechanical Engineering, Indian Institute of Science, Bangalore, 560012, India

---

\*Corresponding Authors E-mail:  
S. Awasthi: [ashikha@iisc.ac.in](mailto:ashikha@iisc.ac.in),  
S. K. Pandey: [sarveshp@iisc.ac.in](mailto:sarveshp@iisc.ac.in)  
C. Srivastava: [csrivastava@iisc.ac.in](mailto:csrivastava@iisc.ac.in)

A clear picture of the QTAIM molecular graphs of all the three composite models can be seen in Figures **S1** (CNT), **S2** (HAP-hBN), **S3** (HAP-GrO), and **S4** (HAP-CNT) which illustrate all binding features [noncovalent (*via* conventional and NBPs) and covalent interactions] involved therein the species. *For the sake of clarity of the graphical visualization of all the MNIs, NCIs, and weak vdW interactions, all the three dimer complexes can be seen by viewing these through Zoom (Zoom-In Mode).*

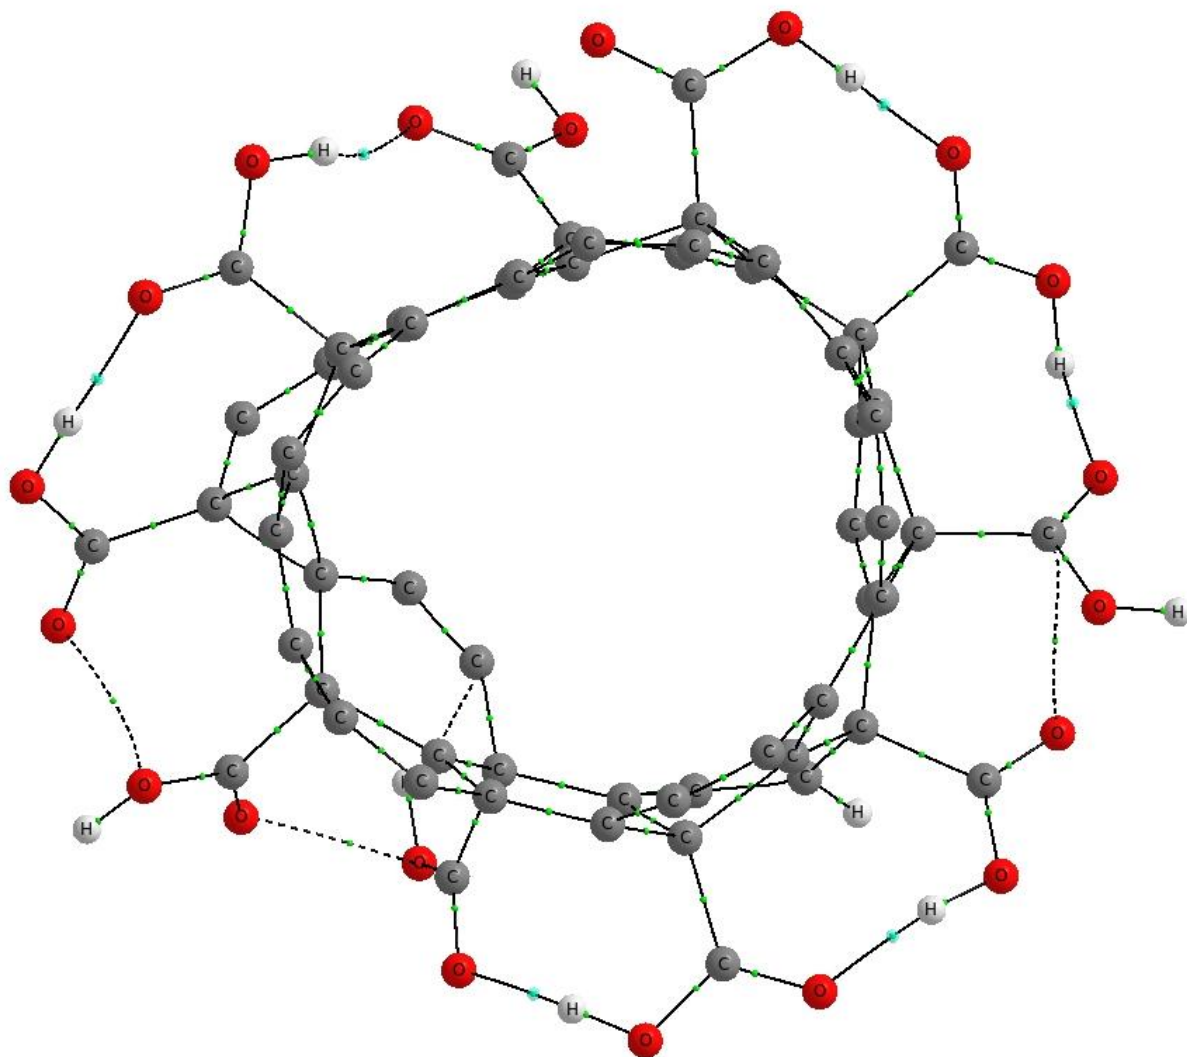

Figure **S1**. QTAIM-based Molecular Graph for the HAP-CNT Composite Model

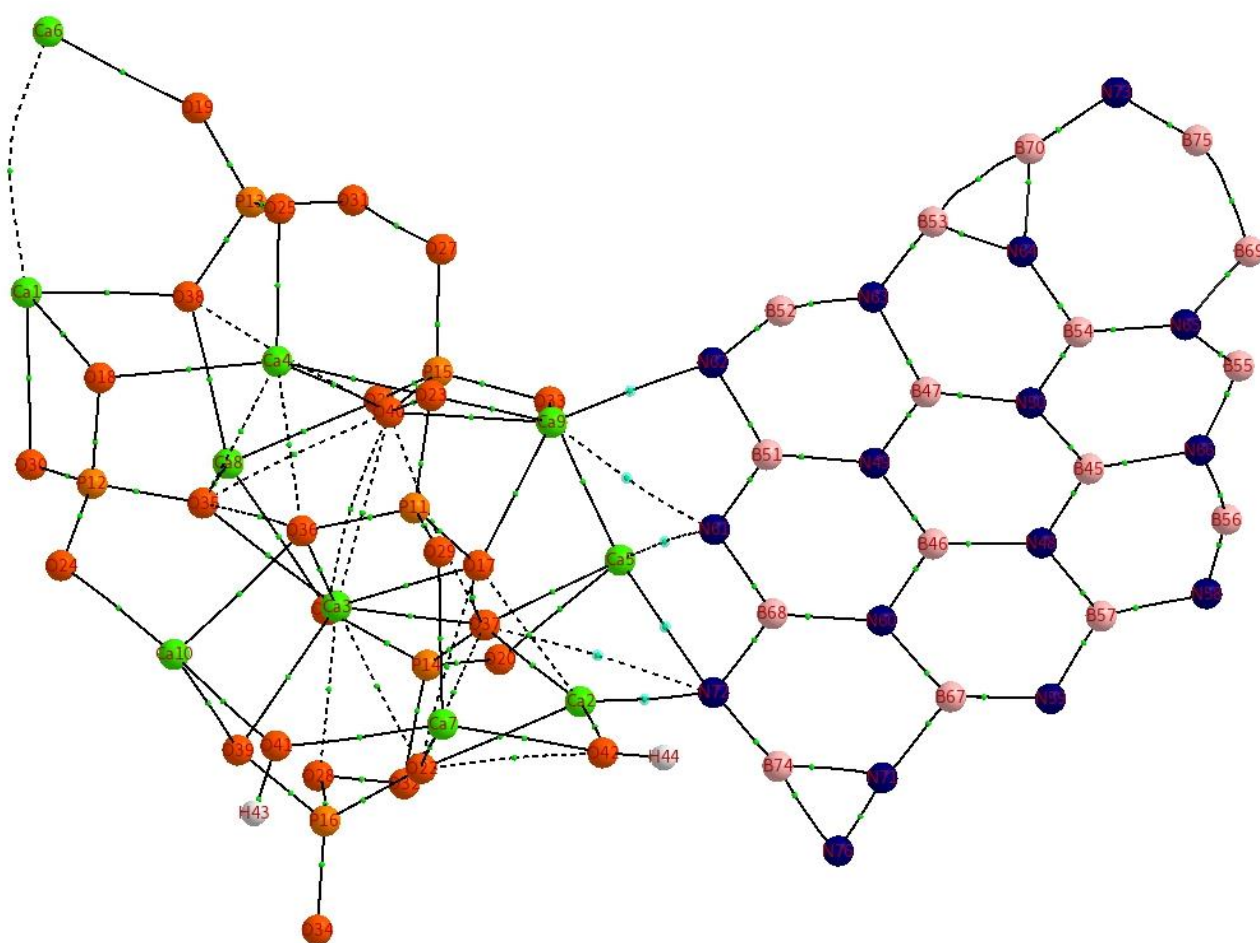

Figure S2. QTAIM-based Molecular Graph for the HAP-hBN Composite Model



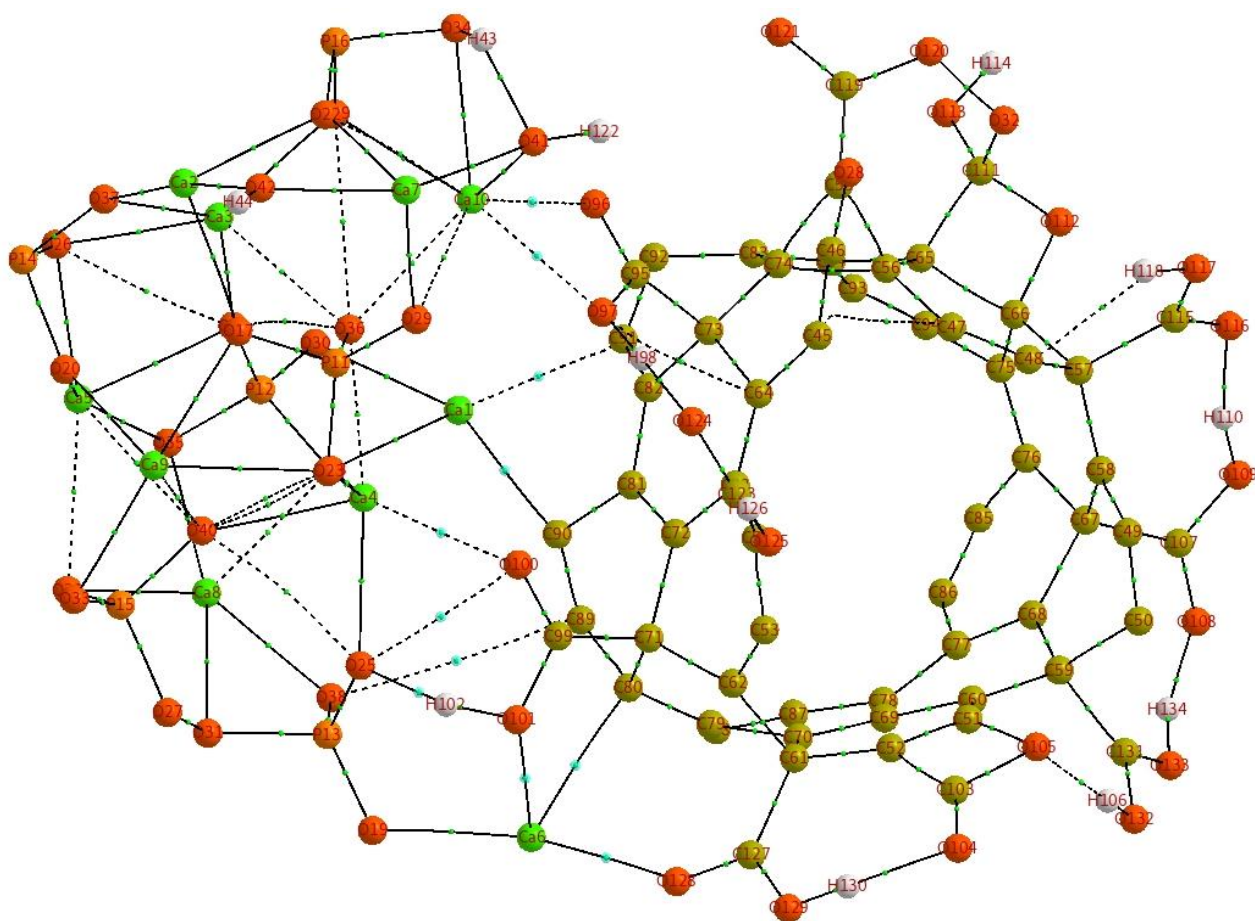

Figure S4. QTAIM-based Molecular Graph for the HAP-CNT Composite Model

**Table S1.** Some Important and Selected Optimized Geometrical Parameters (Bond Length and Bond Angle) and QTAIM-based Topological Parameters [ $\rho$ ,  $\nabla^2(\rho)$ , and  $V$ ] of the HAP-hBN, HAP-GrO, and HAP-CNT Composite Models

| <b>HAP-hBN</b>                                      |                           |                |                          |             |
|-----------------------------------------------------|---------------------------|----------------|--------------------------|-------------|
| MNIs                                                |                           |                |                          |             |
| Bonding /Nonbonding Interaction                     | Bond Length (Å)/Angle (°) | $\rho$ (in au) | $\nabla^2(\rho)$ (in au) | $V$ (in au) |
| Ca9-N62                                             | 2.382                     | 0.0366         | +0.1859                  | -0.0381     |
| Ca5-N72                                             | 2.493                     | 0.0303         | +0.1365                  | -0.0288     |
| Ca2-N72                                             | 2.541                     | 0.0278         | +0.1199                  | -0.0254     |
| Ca9--N61                                            | 2.69                      | 0.0201         | +0.081                   | -0.0164     |
| Ca5--N61                                            | 2.693                     | 0.0207         | +0.0811                  | -0.017      |
| Nonconventional bond path (stabilizing interaction) |                           |                |                          |             |
| O37...N72                                           | 3.211                     | 0.0113         | +0.0272                  | -0.0075     |
| <b>HAP-GrO</b>                                      |                           |                |                          |             |
| MNIs                                                |                           |                |                          |             |
| Ca5-O51                                             | 2.294                     | 0.0419         | +0.2277                  | -0.0482     |
| Ca9-O66                                             | 2.352                     | 0.0369         | +0.1914                  | -0.0403     |
| Ca2-O66                                             | 2.4                       | 0.0312         | +0.121                   | -0.0324     |
| Ca9-O87                                             | 2.469                     | 0.0262         | +0.1327                  | -0.0257     |
| Ca5-O54                                             | 2.488                     | 0.0271         | +0.1255                  | -0.0263     |
| Ca2-O32                                             | 2.545                     | 0.0223         | +0.114                   | -0.0225     |
| H-bond                                              |                           |                |                          |             |
| O37-H56...O51                                       | 1.831/159.3°              | 0.0354         | +0.1043                  | -0.0299     |
| Nonconventional bond path (stabilizing interaction) |                           |                |                          |             |
| O37...O66                                           | 3.004                     | 0.0107         | +0.0328                  | -0.0083     |
| O33...C50                                           | 3.342                     | 0.0054         | +0.0188                  | -0.0032     |
| <b>HAP-CNT</b>                                      |                           |                |                          |             |
| Ca6-O128                                            | 2.269                     | 0.0402         | +0.2424                  | -0.0467     |
| Ca6-O101                                            | 2.449                     | 0.0283         | +0.1435                  | -0.0285     |
| Ca4-O100                                            | 2.496                     | 0.0229         | +0.1191                  | -0.0218     |
| Ca10-O97                                            | 2.513                     | 0.0236         | +0.1160                  | -0.0227     |
| Ca10-O96                                            | 2.63                      | 0.0197         | +0.0858                  | -0.0176     |
| Ca1...C90                                           | 2.539                     | 0.0327         | +0.1256                  | -0.0302     |
| Ca1-C91                                             | 2.639                     | 0.0248         | +0.0894                  | -0.0202     |
| Ca6-C80                                             | 2.64                      | 0.0262         | +0.0951                  | -0.0218     |
| H-bond                                              |                           |                |                          |             |
| O101-H102...O25                                     | 1.559/148.3               | 0.0658         | +0.1805                  | -0.0594     |
| Nonconventional bond path (stabilizing interaction) |                           |                |                          |             |
| O25...O100                                          | 2.843                     | 0.0123         | +0.0478                  | -0.0111     |
| O38...C89                                           | 3.752                     | 0.0023         | +0.0079                  | -0.0009     |

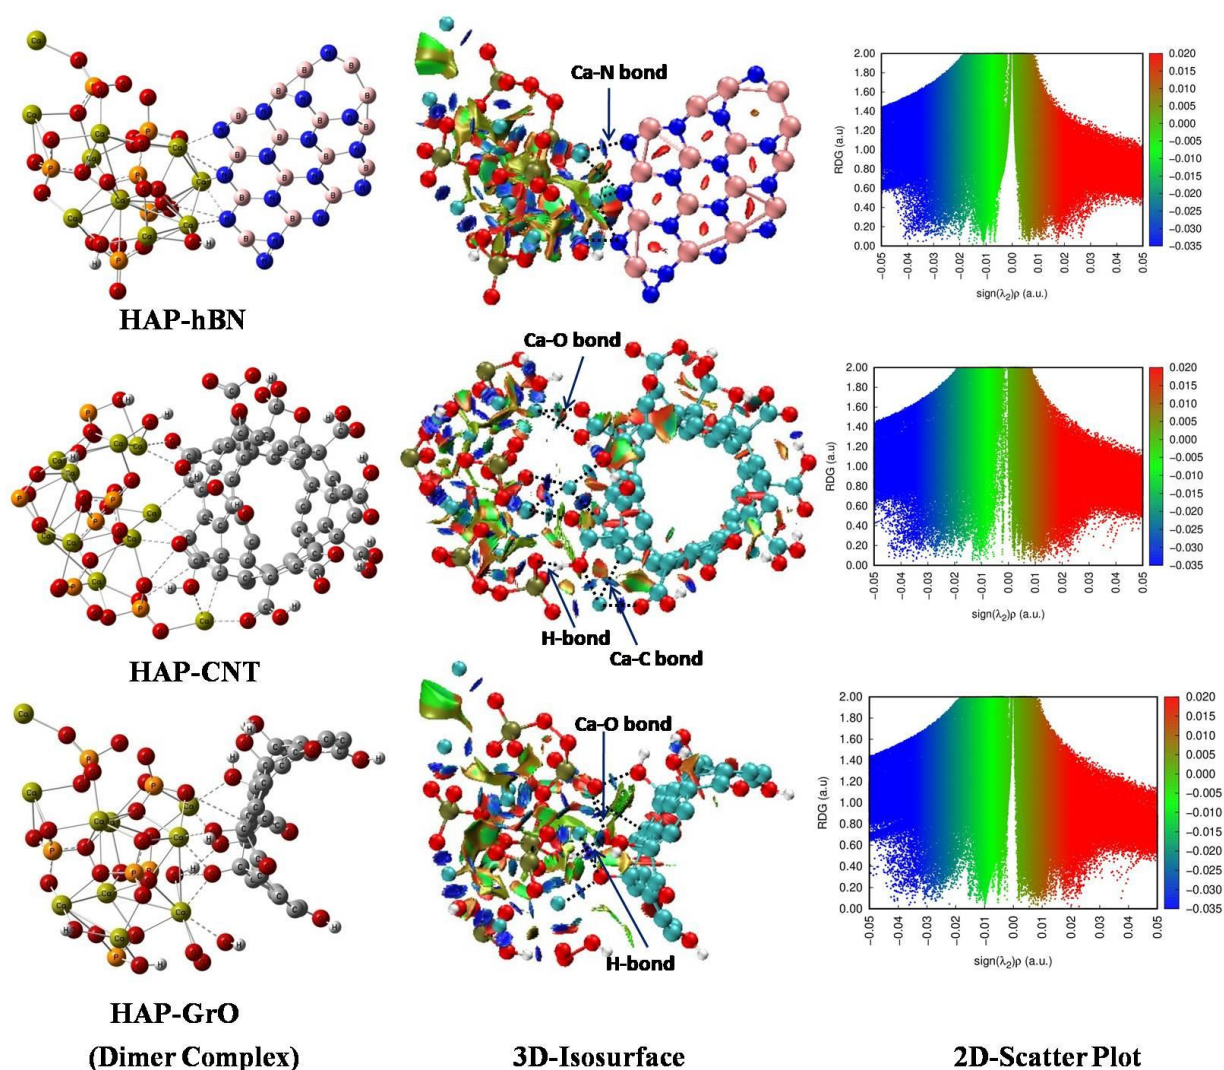

Figure S5 (For the sake of clarity of the graphical visualization of all the MNIs, NCIs, and weak *vdW* interactions, it is Figure 10 taken from the article). Optimized/Equilibrium Structures (left), 3D-Isosurfaces (middle), and 2D-Scatter Plots (right) of the HAP-hBN (top), and HAP-CNT (middle), HAP-GrO (bottom) dimer model complexes at the B3LYP/6-31G level of theory.

**Note 1:** All MNIs and NCIs involved in all three dimer composites can be seen by doing (Zoom-In Mode) the structures.

### NCI-Plot (2D scattered plot and 3D isosurface map)

Understanding and plotting of the NCIs in a better way, a detail information can be seen in the literature [Contreras-García, J.; Johnson, E. R.; Keinan, S.; Chaudret, R.; Piquemal, J. P.; Beratan, D.N.; Yang, W. NCIPLOT: A Program for Plotting Noncovalent Interaction Regions. *J. Chem. Theory Comput.* **2011**, 7 (3), 625–632; Johnson, E. R.; Keinan, S.; Mori-Sánchez, P.; Contreras-García, J.; Cohen, A. J.; Yang, W. Revealing Noncovalent Interactions. *J. Am. Chem. Soc.* **2010**, 132 (18), 6498–6506]. Some attention-grabbing insights into the electron density (ED)

and its derivatives-based method can be seen in the literature reported by Yang *et al* [Johnson, E. R.; Keinan, S.; Mori-Sánchez, P.; Contreras-García, J.; Cohen, A. J.; Yang, W. Revealing Noncovalent Interactions. *J. Am. Chem. Soc.* **2010**, *132* (18), 6498–6506]. A comprehensive analysis of the NCI-plot on some biocomposites can be seen in literature [S. Awasthi, J. Gaur, S. K. Pandey, M. S. Bobji, and C. Srivastava, High Strength, Strongly Bonded Nanocomposite Hydrogels for Cartilage Repair *ACS App. Mat. Int.* **13**, (2021), 24505-24523] and references therein.

**Hints:** The RDG isosurface displayed on horizontal axis is 0.5 (ranging from -0.05 to +0.05). The  $\Omega(r)$  values ranging from -0.035 atomic unit (au) to +0.02 au on vertical axis (Figure 10, right) show the color surfaces of the species on a blue-green-red scale. The detailed description of the NCI tool clarifies that the higher density values ( $\Omega(r) < 0$ ) show the stronger attractive interactions while the very low-density values ( $\Omega(r) > 0$ ) indicate the repulsive interactions. Moreover, blue color spike in the scatter map two-dimensional (2D) plot and blue color disc-shaped NCI isosurface three-dimensional (3D) representation showing the attractive (stabilizing) interaction. The green color spikes in the 2D scatter plot and green color disc-shaped NCI 3D isosurface demonstrating a variety of vdW interactions. The presence of steric effect is evidently shown by the low-gradient spikes appearing at positive side. This effect as shown by the red ellipsoid depicts the electron density depletion which is because of the electrostatic repulsion.
